# Supplementary material for: Mechanism exploration of the enhancement of thermal energy storage in molten salt nanofluid
Source: Royal Society of Chemistry journal article supplement (doi:10.1039/d1cp00125f), 2021-01-01
Supplement: d1cp00125f1.pdf [file d1cp00125f1.pdf]

1 Supporting Information for “Mechanism Exploration of the Enhancement  
2 of Thermal Energy Storage in Molten Salt nanofluid

3 ”

4 Zhao Li<sup>1</sup>, Liu Cui<sup>1\*</sup>, Baorang Li<sup>1</sup>, Xiaoze Du<sup>2\*</sup>

5 *1 Key Laboratory of Power Station Energy Transfer Conversion and System (North*  
6 *China Electric Power University), Ministry of Education, Beijing 102206, China.*

7 *2 School of Energy and Power Engineering, Lanzhou University of Technology,*  
8 *Lanzhou 730050, China.*

9 \*To whom correspondence should be addressed.

10 E-mail: liucui@ncepu.edu.cn (Liu Cui); duxz@ncepu.edu.cn (Xiaoze Du)

11 The Born-Mayer-Huggins (BMH) potential with Coulomb potential, shown in Eq. (S1),  
 12 was used to describe the interaction between two no-bonded atoms of the carbonate  
 13 base fluid<sup>1</sup>. Meanwhile, the bonded interactions with bond stretching, bond bending  
 14 and torsion in CO<sub>3</sub><sup>2-</sup> were calculated as Eq. (S2)<sup>2</sup>. Besides, the Buckingham potential  
 15 with Coulombic interaction, shown in Eq. (S3)<sup>3</sup>, was used to describe the interaction  
 16 between two non-bond atoms in the SiO<sub>2</sub> nanoparticle. The Lennard-Jones (L-J) with  
 17 Coulombic interaction, shown in Eq. (S4), was applied as force field for the Al<sub>2</sub>O<sub>3</sub>  
 18 nanoparticle. The bonded interactions with bond stretching, bond bending and torsion  
 19 is shown in Eq. (S2)<sup>4</sup>. For both two nanofluid, the interaction between nanoparticle and  
 20 base fluid was described by L-J potential energy with Coulombic interaction, shown in  
 21 Eq. (S4). Moreover, the Particle-particle-particle-mesh (pppm) with an accuracy of 10<sup>-4</sup>  
 22 was used for coulombic interactions in the MD simulation of this paper<sup>5</sup>. The  
 23 parameters used in the potential mentioned above are all given in the Table S1.

$$24 \quad E_{ij}(r) = \frac{z_i z_j e^2}{r_{ij}} + b \left( 1 + \frac{z_i}{n_i} + \frac{z_j}{n_j} \right) \exp[\alpha(\sigma_i + \sigma_j - r_{ij})] \quad (S1)$$

25 where  $z_i$  and  $z_j$  are the ion valences of ion  $i$  and  $j$ ,  $e$  is the electric charge unit,  $n_i$  and  $n_j$   
 26 are the number of electrons in the outer atomic shell,  $\sigma_i$  and  $\sigma_j$ , can be interpreted as the  
 27 ionic radius and  $r_{ij}$  is the distance between atoms  $i$  and  $j$ . Moreover, the constants  
 28  $b=4.865$  kcal/mol and  $\sigma=3.45$  Å<sup>-1</sup> determine the weight and steepness of the BMH  
 29 interaction<sup>1</sup>, respectively.

$$30 \quad E_{\text{bond}} = K_s (r - r_0)^2 + K_b (\theta - \theta_0) + K_t (1 + d \cdot \cos(n\phi)) \quad (S2)$$

31 where  $K_s$ ,  $K_b$  and  $K_t$  are the stretching constant, bending constant and torsional constant,  
 32 respectively. Besides,  $r$  and  $\theta$  are the bond length and bond angle,  $r_0$  and  $\theta_0$  are the bond  
 33 length and angle at a balanced condition.

$$34 \quad E_{ij}(r) = A_{ij} e^{-\frac{r_{ij}}{\rho_{ij}}} - \frac{C_{ij}}{r_{ij}^6} + \frac{q_i q_j}{r_{ij}} \quad (S3)$$

35 where  $E_{ij}$  is the interaction energy,  $r_{ij}$  is the distance between site  $i$  and  $j$ .  $q_i$  and  $q_j$  are  
 36 the charges of the atom at site  $i$  and  $j$ , respectively.

$$37 \quad E_{ij}(r) = \frac{q_i q_j}{r_{ij}} + 4\xi \left[ \left( \frac{\sigma_{ij}}{r_{ij}} \right)^{12} - \left( \frac{\sigma_{ij}}{r_{ij}} \right)^6 \right] \quad (S4)$$

38 where  $r_{ij}$  is the distance between atom  $i$  and  $j$ , and  $\xi_{ij}$  is the potential well depth while  
 39  $\sigma_{ij}$  is the distance between atom  $i$  and  $j$  where the inter-particle potential is zero.

40 Table S1 (a). Potential parameters for the carbonate base fluid in this study<sup>2, 6</sup>

| Parameters          |              | Carbonate salt base fluid        |         |       |      |       |
|---------------------|--------------|----------------------------------|---------|-------|------|-------|
| BMH potential       | Interaction  |                                  | C-C     | O-O   | K-K  | Li-Li |
|                     | $q$ (e)      |                                  | 1.54    | -1.18 | 1.00 | 1.00  |
|                     | $n$          |                                  | 2.46    | 7.18  | 8.00 | 2.00  |
|                     | $\sigma$ (Å) |                                  | 1.10    | 1.33  | 1.39 | 0.77  |
| Bonded interactions | Stretching   | $K_s$ (Kcal/mol/Å <sup>2</sup> ) | 4612    |       |      |       |
|                     |              | $r_0$ (Å)                        | 1.29    |       |      |       |
|                     | Bending      | $K_b$ (Kcal/mol)                 | 107.435 |       |      |       |
|                     |              | $\theta_0$ (°)                   | 120     |       |      |       |
|                     | Torsion      | $K_t$ (Kcal/mol)                 | 1.139   |       |      |       |
|                     |              | $d$                              | -1      |       |      |       |
|                     | $n$          | 0                                |         |       |      |       |

41

42 Table S1 (b). Potential parameters for the SiO<sub>2</sub> nanoparticle in this study<sup>3</sup>

| Atom                     | $q_i$ (e) | $A_{ii}$ (Kcal·mol <sup>-1</sup> ) | $\rho_{ii}$ (Å) | $C_{ii}$ (Kcal·mol <sup>-1</sup> ·Å <sup>6</sup> ) |
|--------------------------|-----------|------------------------------------|-----------------|----------------------------------------------------|
| O (In SiO <sub>2</sub> ) | -0.955209 | 15170.70                           | 0.386           | 617.24                                             |
| Si                       | 1.910418  | 72460.64                           | 0.351           | 14415.29                                           |

43

44 Table S1 (c). Potential parameters for the Al<sub>2</sub>O<sub>3</sub> nanoparticle in this study<sup>4</sup>

| Parameters          |                    | Al <sub>2</sub> O <sub>3</sub> nanoparticle |        |                  |       |
|---------------------|--------------------|---------------------------------------------|--------|------------------|-------|
| L-J potential       | Interaction        | Al-Al                                       |        | O-O              |       |
|                     | $\zeta$ (Kcal/mol) | 0.040                                       |        | 0.228            |       |
|                     | $\sigma$ (Å)       | 4.053                                       |        | 2.860            |       |
|                     | $q$ (e)            | 1.5                                         |        | -1.0             |       |
| Bonded interactions | Stretching         | $K_s$ (Kcal/mol/Å <sup>2</sup> )            | 392.8  |                  |       |
|                     |                    | $r_0$ (Å)                                   | 1.775  |                  |       |
|                     | Bending            | $K_b$ (Kcal/mol)                            | 100.3  | $K_b$ (Kcal/mol) | 31.1  |
|                     |                    | $\theta_0$ (°)                              | 109.5  | $\theta_0$ (°)   | 149.8 |
|                     | Torsion            | $K_t$ (Kcal/mol)                            | 26.270 |                  |       |
|                     |                    | $d$                                         | -1     |                  |       |
|                     |                    | $n$                                         | 2      |                  |       |

45

46 Table S1 (d) L-J potential parameters for the interaction between nanoparticle and base fluid<sup>4, 6, 7</sup>

| Materials                      | Interaction                             | $\zeta$ (Kcal/mol) | $\sigma$ (Å) | $q$ (e)   |
|--------------------------------|-----------------------------------------|--------------------|--------------|-----------|
| SiO <sub>2</sub>               | Si-Si                                   | 0.040              | 4.053        | 1.910418  |
|                                | O-O(in SiO <sub>2</sub> )               | 0.228              | 2.860        | -0.955209 |
| Al <sub>2</sub> O <sub>3</sub> | Al-Al                                   | 0.040              | 4.053        | 1.5       |
|                                | O-O(in Al <sub>2</sub> O <sub>3</sub> ) | 0.228              | 2.860        | -1.0      |
|                                | C-C                                     | 0.148              | 3.617        | 1.54      |
| Carbonate base fluid           | O-O(in CO <sub>3</sub> <sup>2-</sup> )  | 0.228              | 2.88         | -1.18     |
|                                | K-K                                     | 5.451              | 3.197        | 1         |
|                                | Li-Li                                   | 4.735              | 2.839        | 1         |

## 47 References

- 48 1. A. Ottochian, C. Ricca, F. Labat and C. Adamo, *Journal of molecular modeling*,
- 49 2016, **22**, 61.
- 50 2. B. Jo and D. Banerjee, 2011.
- 51 3. G. Qiao, M. Lasfargues, A. Alexiadis and Y. Ding, *Applied Thermal*
- 52 *Engineering*, 2017, **111**, 1517-1522.
- 53 4. Y. Hu, Y. He, Z. Zhang and D. Wen, *Energy Conversion and Management*,
- 54 2017, **142**, 366-373.
- 55 5. G. Qiao, A. Alexiadis and Y. Ding, *Powder technology*, 2017, **314**, 660-664.
- 56 6. F. Yuan, M.-J. Li, Y. Qiu, Z. Ma and M.-J. Li, *Appl. Energy*, 2019, **250**, 1481-
- 57 1490.
- 58 7. Y. Hu, Y. He, Z. Zhang and D. Wen, *Solar Energy Materials and Solar Cells*,
- 59 2019, **192**, 94-102.
- 60
